# Supplementary material for: Association Between Plant-Based Diet Quality and Metabolic Dysfunction-Associated Steatotic Liver Disease (MASLD) in the Multiethnic Cohort Study
Source: Research Square preprint supplement (doi:10.21203/rs.3.rs-7403556/v1), 2025-09-09
Supplement: Supplementary file 1 [file 2aded1f31836d85a90b1b47c.docx]

**Supplementary Table S3.** Association (ORs and 95% CI) between component food groups and MASLD.

|  | **OR** | **95% CI** | **p-value** |
| --- | --- | --- | --- |
| Whole grains | 0.95 | 0.87, 1.04 | 0.30 |
| Fruits | 1.01 | 0.92, 1.12 | 0.78 |
| Vegetables | 0.98 | 0.89, 1.07 | 0.61 |
| Vegetable oils | 1.05 | 0.97, 1.14 | 0.25 |
| Nuts | 0.90 | 0.82, 0.98 | **0.02** |
| Legumes | 0.94 | 0.85, 1.04 | 0.24 |
| Tea/Coffee | 1.04 | 0.96, 1.14 | 0.34 |
| Refined Grains | 0.96 | 0.87, 1.07 | 0.50 |
| Fruit juices | 1.04 | 0.95, 1.14 | 0.35 |
| Potatoes | 1.05 | 0.85, 1.15 | 0.35 |
| Added sugars | 1.10 | 1.00, 1.21 | 0.06 |
| Animal fats | 1.09 | 1.01, 1.19 | **0.04** |
| Dairy | 1.00 | 0.91, 1.10 | 1.00 |
| Eggs | 1.02 | 0.93, 1.11 | 0.66 |
| Fish/seafood | 0.99 | 0.90, 1.09 | 0.84 |
| Meat | 1.05 | 0.95, 1.16 | 0.37 |

OR per one-point increase (1, lowest intake; 5, highest intake)
