# Supplementary material for: Association Between Plant-Based Diet Quality and Metabolic Dysfunction-Associated Steatotic Liver Disease (MASLD) in the Multiethnic Cohort Study
Source: Research Square preprint supplement (doi:10.21203/rs.3.rs-7403556/v1), 2025-09-09
Supplement: Supplementary file 2 [file 567cfe7bde30b42475e4620a.docx]

**Supplementary Table S4.** Association between component food groups and log-transformed liver fat content. Estimates with 95% confidence intervals (CIs) and p-values were derived from a multivariable linear regression model, adjusting for age, sex, physical activity, alcohol intake, BMI, and race/ethnicity. Negative beta coefficients indicate that higher intake of the food group is associated with lower liver fat content.

|  | **Estimate** | **95% CI** | **p-value** |
| --- | --- | --- | --- |
| Whole grain | 0.99 | 0.97, 1.01 | 0.28 |
| Fruit | 0.99 | 0.97, 1.01 | 0.53 |
| Vegetable | 0.99 | 0.97, 1.00 | 0.12 |
| Vegetable oil | 1.01 | 1.00, 1.03 | 0.13 |
| Nut | 0.97 | 0.96, 0.99 | **0.004** |
| Legume | 0.99 | 0.97, 1.01 | 0.49 |
| Tea/Coffee | 1.00 | 0.99, 1.02 | 0.78 |
| Refined Grain | 1.00 | 0.98, 1.02 | 0.82 |
| Juice | 1.01 | 0.99, 1.03 | 0.23 |
| Potato | 1.00 | 0.98, 1.01 | 0.61 |
| Added Sugar | 1.02 | 1.00, 1.04 | 0.10 |
| Fat | 1.02 | 1.00, 1.03 | 0.05 |
| Dairy | 0.99 | 0.98, 1.01 | 0.52 |
| Egg | 1.01 | 1.00, 1.03 | 0.14 |
| Fish | 0.99 | 0.97, 1.01 | 0.34 |
| Meat | 1.02 | 1.00, 1.04 | 0.10 |
