# Supplementary material for: Association Between Plant-Based Diet Quality and Metabolic Dysfunction-Associated Steatotic Liver Disease (MASLD) in the Multiethnic Cohort Study
Source: Research Square preprint supplement (doi:10.21203/rs.3.rs-7403556/v1), 2025-09-09
Supplement: Supplementary file 3 [file 9e61f7d84485ae41ae7a1c06.docx]

**Supplementary Table S2.** Association between hPDI and liver fat content stratified by race/ethnicity.

|  | **N (%)** | **Adjusted Mean (% volume)** | **95% CI** | **p-value** |
| --- | --- | --- | --- | --- |
| African American |  |  |  |  |
| Q1 (<41) | 118 (22) | 3.38 | 3.02, 3.78 | Reference |
| Q2 (42-46) | 66 (16) | 3.72 | 3.30, 4.18 | 0.25 |
| Q3 (47-51) | 48 (13) | 3.19 | 2.79, 3.63 | 0.50 |
| Q4 (≥70) | 42 (15) | 3.70 | 3.25, 4.20 | 0.30 |
| Native Hawaiian |  |  |  |  |
| Q1 (<42) | 108 (20) | 4.77 | 4.17, 5.43 | Reference |
| Q2 (43-47) | 63 (15) | 4.58 | 3.90, 5.35 | 0.71 |
| Q3 (48-52) | 48 (13) | 4.62 | 3.96, 5.36 | 0.77 |
| Q4 (≥69) | 36 (13) | 4.15 | 3.50, 4.91 | 0.21 |
| Japanese American |  |  |  |  |
| Q1 (<46) | 114 (21) | 5.84 | 5.12, 6.64 | Reference |
| Q2 (47-50) | 108 (26) | 5.54 | 4.92, 6.24 | 0.55 |
| Q3 (51-56) | 98 (27) | 5.79 | 5.15, 6.50 | 0.98 |
| Q4 (≥70) | 82 (30) | 4.95 | 4.40, 5.56 | 0.06 |
| Latino |  |  |  |  |
| Q1 (<45) | 101 (19) | 6.40 | 5.61, 7.27 | Reference |
| Q2 (46-49) | 98 (24) | 5.65 | 5.05, 6.30 | 0.15 |
| Q3 (50-53) | 93 (25) | 5.55 | 4.97, 6.18 | 0.10 |
| Q4 (≥67) | 53 (19) | 4.72 | 4.17, 5.32 | **0.001** |
| White |  |  |  |  |
| Q1 (<45) | 97 (18) | 4.46 | 3.97, 5.00 | Reference |
| Q2 (46-50) | 80 (19) | 3.87 | 3.44, 4.35 | 0.09 |
| Q3 (51-55) | 78 (21) | 3.78 | 3.35, 4.26 | 0.05 |
| Q4 (≥68) | 67 (24) | 3.30 | 2.94, 3.69 | **<0.001** |

Adjusted means, 95% confidence intervals (CIs), and p-values were derived from multivariable linear regression models stratified by self-reported ethnicity. The healthful plant-based diet index (hPDI) was categorized into quartiles, with Q1 (lowest adherence) as the reference group. Models were adjusted for age, sex, physical activity, alcohol intake, and BMI. Bolded values indicate statistically significant associations (*p* < 0.05).
