# Supplementary material for: Association Between Plant-Based Diet Quality and Metabolic Dysfunction-Associated Steatotic Liver Disease (MASLD) in the Multiethnic Cohort Study
Source: Research Square preprint supplement (doi:10.21203/rs.3.rs-7403556/v1), 2025-09-09
Supplement: Supplementary file 4 [file e216a5e0fca73f1a0d41e4e5.docx]

**Supplementary Table S1.** Participant characteristics of excluded individuals not qualifying for MASLD classification, according to extreme quintiles of the plant-based diet indices, Multiethnic Cohort Adiposity Phenotype Study (n = 229).¹

|  | Overall | PDI | | hPDI | | uPDI | |
| --- | --- | --- | --- | --- | --- | --- | --- |
|  | (n = 229) | Q1 (n=46) | Q5 (n=45) | Q1 (n=46) | Q5 (n=45) | Q1 (n=46) | Q5 (n=45) |
| Age, y | 69.4 ± 2.7 | 69.8 ± 2.2 | 69.3 ± 2.8 | 69.4 ± 3.3 | 69.7 ± 2.7 | 69.4 ± 2.6 | 69.6 ± 3.3 |
| Female, n (%) | 94 (41%) | 24 (52.2%) | 14 (31.1%) | 22 (47.8%) | 15 (33.3%) | 20 (43.5%) | 14 (31.1%) |
| Ethnicity, n (%) |  |  |  |  |  |  |  |
| African American | 32 (14%) | 6 (13%) | 7 (15.6%) | 11 (23.9%) | 2 (4.4%) | 2 (4.3%) | 13 (28.9%) |
| Native Hawaiian | 43 (18.8%) | 5 (10.9%) | 5 (11.1%) | 10 (21.7%) | 9 (20%) | 11 (23.9%) | 6 (13.3%) |
| Japanese American | 30 (13.1%) | 7 (15.2%) | 5 (11.1%) | 5 (10.9%) | 4 (8.9%) | 5 (10.9%) | 5 (11.1%) |
| Latino | 38 (16.6%) | 4 (8.7%) | 15 (33.3%) | 6 (13%) | 11 (24.4%) | 9 (19.6%) | 11 (24.4%) |
| White | 86 (37.6%) | 24 (52.2%) | 13 (28.9%) | 14 (30.4%) | 19 (42.2%) | 19 (41.3%) | 10 (22.2%) |
| Smoking status, n (%) |  |  |  |  |  |  |  |
| Never smoker | 109 (47.6%) | 16 (34.8%) | 26 (57.8%) | 21 (45.7%) | 22 (48.9%) | 18 (39.1%) | 20 (44.4%) |
| Former smoker | 120 (52.4%) | 30 (65.2%) | 19 (42.2%) | 25 (54.3%) | 23 (51.1%) | 28 (60.9%) | 25 (55.6%) |
| BMI, kg/m2 | 28.3 ± 5.4 | 29.3 ± 5.9 | 28.2 ± 5 | 30.4 ± 5.4 | 26.4 ± 4 | 27.7 ± 6 | 29.3 ± 5.3 |
| Alcohol intake, g/d | 34.1 ± 35.3 | 50.3 ± 55.1 | 27.6 ± 31.5 | 23.5 ± 41 | 34.2 ± 32.9 | 25.6 ± 19.4 | 36.1 ± 47.6 |
| Physical activity, METs/d | 1.6 ± 1.3 | 1.6 ± 1.3 | 1.4 ± 1.2 | 1.5 ± 1.5 | 1.9 ± 1.6 | 1.8 ± 1.4 | 1.4 ± 1.5 |

1Values are presented as mean ± standard deviation unless noted for number (percentage). Participants were grouped into quintiles (Q1–Q5) based on their score, with Q1 representing the lowest adherence and Q5 the highest.
BMI = body mass index; MET = metabolic equivalent. Percentages may not total 100% due to rounding.
